# Supplementary material for: Association between Adherence to the Japanese Food Guide Spinning Top and Sleep Quality in College Students
Source: MDPI journal article supplement (doi:10.3390/nu10121996), 2018-12-16
Supplement: s1 [file s1]

**Table S1.** Details of the categories used for calculating the Food Guide score

|                                                                                        |                                                                                                                                                                                                                                                                           |
|----------------------------------------------------------------------------------------|---------------------------------------------------------------------------------------------------------------------------------------------------------------------------------------------------------------------------------------------------------------------------|
| <b>Grain dishes</b>                                                                    |                                                                                                                                                                                                                                                                           |
| Rice and rice products                                                                 | White rice, barley rice, germ rice, half threshing, 70% threshing brown rice                                                                                                                                                                                              |
| Noodle and pasta                                                                       | Buckwheat, wheat noodles, thin wheat noodles, instant noodles, cup noodles, other Chinese noodles, spaghetti and pasta                                                                                                                                                    |
| Bread and other                                                                        | Bread, butter rolls, croissant, pizza, okonomiyaki, corn flakes                                                                                                                                                                                                           |
| <b>Vegetable dishes</b>                                                                |                                                                                                                                                                                                                                                                           |
| Green and yellow vegetables                                                            | Carrot, pumpkin, tomato, green pepper, broccoli, green-leafy vegetables                                                                                                                                                                                                   |
| Other vegetables                                                                       | Cabbage, cucumber, lettuce, Chinese cabbage, sprouts, radish, onion, cauliflower, eggplant, burdock, lotus root, fried potato, potato, sweet potatoes, taro, konjac, seaweed, laver, peanuts, nuts, vegetable juice, tomato juice                                         |
| Pickles                                                                                | Pickled ume, pickled vegetables and pickled products                                                                                                                                                                                                                      |
| Mushrooms                                                                              | Mushrooms                                                                                                                                                                                                                                                                 |
| <b>Fish and meat dishes</b>                                                            |                                                                                                                                                                                                                                                                           |
| Meats                                                                                  | Ground meat (beef and/or pork), chicken, pork, beef, liver, ham or sausage, bacon                                                                                                                                                                                         |
| Fish                                                                                   | Dried fish, small fish with bones, tuna (oily), broiled eel, fish with white meat, fish with blue skin, fish with red meat, fish paste products, shrimp, squid, octopus, oysters, other shellfish, fish eggs, salted fish roe, foods boiled down in soy sauce (tsukudani) |
| Egg                                                                                    | Eggs                                                                                                                                                                                                                                                                      |
| Soy products                                                                           | Tofu, tofu products as ganmodoki, natto, cooked soybean, soybean milk miso (except for miso soup), miso (miso in miso soup)                                                                                                                                               |
| <b>Milk and milk products</b>                                                          |                                                                                                                                                                                                                                                                           |
| Milk                                                                                   | Milk (normal milk), milk (low fat), skim milk                                                                                                                                                                                                                             |
| Yogurt                                                                                 | Yogurt (sweet and/or sugarless and/or low-sugar)                                                                                                                                                                                                                          |
| Cheese and other milk products                                                         | Cheese, cottage cheese, cream in coffee                                                                                                                                                                                                                                   |
| <b>Fruits</b>                                                                          |                                                                                                                                                                                                                                                                           |
| Fresh fruits                                                                           | Oranges, bananas, apples, strawberries, grapes, peaches, pear, date plum, kiwi fruit, melon, watermelon                                                                                                                                                                   |
| Other fruits                                                                           | Dried grapes, canned fruits, 100% fruit juice                                                                                                                                                                                                                             |
| <b>Energy from confectioneries, sugar-sweetened beverages, and alcoholic beverages</b> |                                                                                                                                                                                                                                                                           |
| Confectioneries                                                                        | Potato chips, snack confectioneries, Japanese confectioneries (including bean jam), Japanese confectioneries (not including bean jam), confectioneries, cookies, chocolate,                                                                                               |

|                                        |                                                                                                                                                                                           |
|----------------------------------------|-------------------------------------------------------------------------------------------------------------------------------------------------------------------------------------------|
|                                        | rice cracker, candy and/or caramel and/or gum, jelly, sweet buns, pancakes, doughnut,                                                                                                     |
|                                        | ice cream with milk-solids content of 3% or greater,                                                                                                                                      |
|                                        | ice cream with milk-solids content of 15% or greater                                                                                                                                      |
| Alcoholic drinks                       | Beer, sake, shochu, white liquor highball, whiskey and wine.                                                                                                                              |
| Non-alcoholic drinks                   | Coffee, milk beverages, 50% fruit juice, cocoa, sugar-sweetened beverages, non-calorie sugar-sweetened beverages, green tea, tea, oolong tea (including other Chinese teas), revitalizer. |
| <hr/> <b>Total energy intake</b> <hr/> |                                                                                                                                                                                           |
